# Supplementary material for: Truncation of mutant huntingtin in knock-in mice demonstrates exon1 huntingtin is a key pathogenic form
Source: PubMed Central journal article supplement (PMC7244548; doi:10.1038/s41467-020-16318-1), 2020-05-22
Supplement: 41467_2020_16318_MOESM1_ESM.pdf [file 41467_2020_16318_MOESM1_ESM.pdf]

**Truncation of mutant huntingtin in knock-in mice demonstrates exon1 huntingtin is  
a key pathogenic form**

Yang HM et al

Supplementary Information

## Supplementary figures

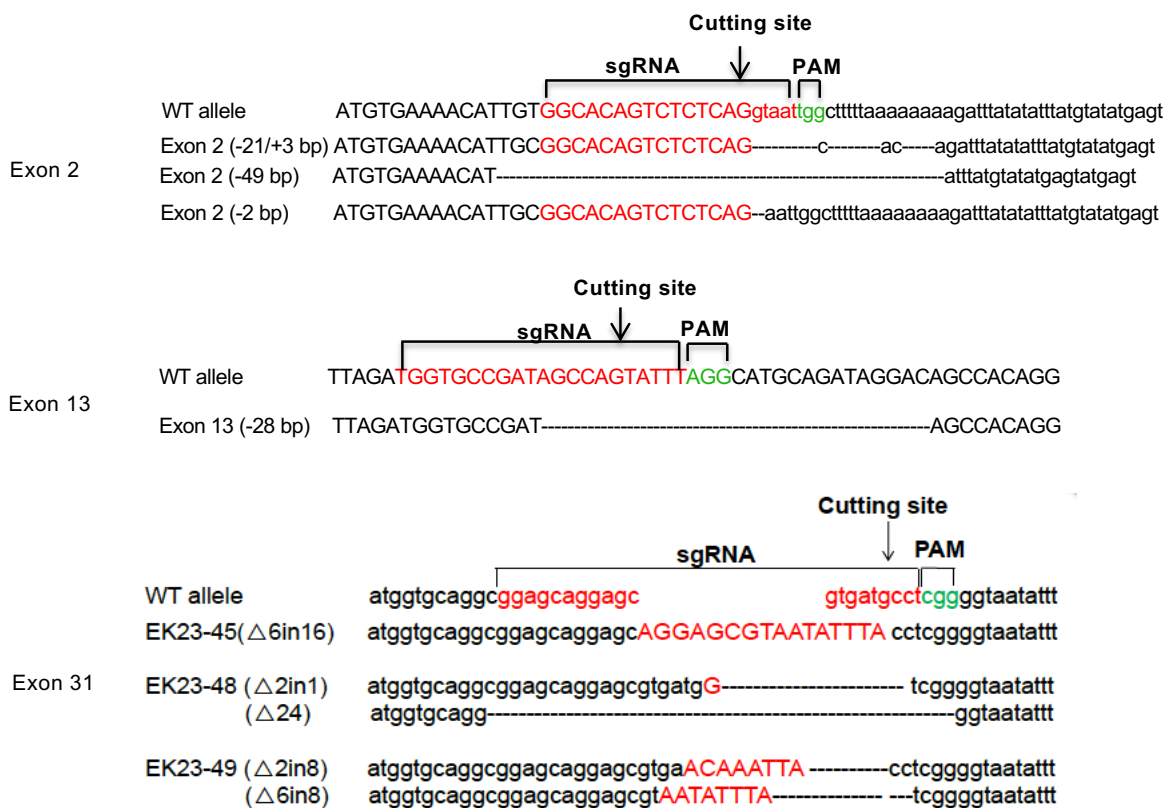

**Supplementary Figure 1. Truncation of endogenous mutant *HTT* gene in HD KI mice via CRISPR/Cas9.** Sequencing verification of mutations in exon 2, exon 13, and exon 31 of the mouse *HTT* gene. These mutations result in N-terminal HTT or truncated HTT fragments. gRNA sequences and indel mutations are indicated.

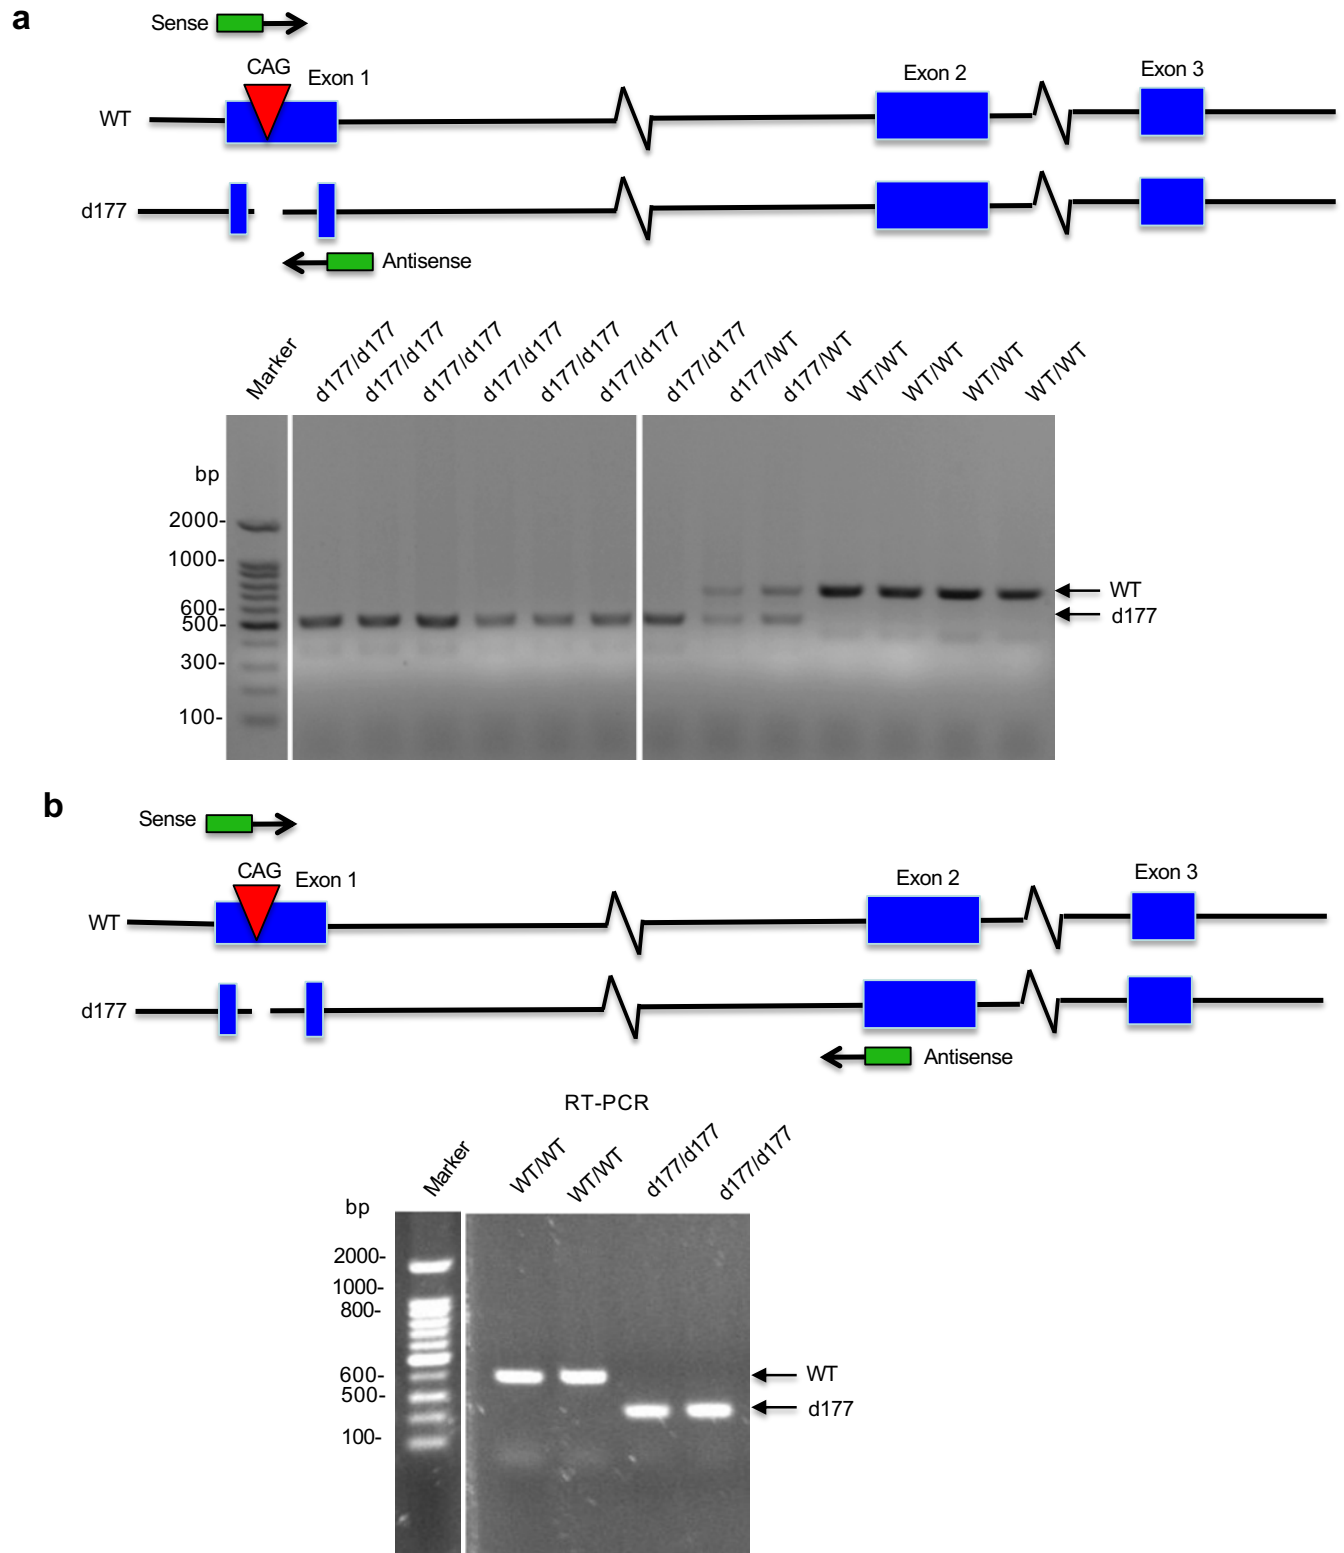

**Supplementary Figure 2. d177 mutation with an in-frame deletion of exon 1 in the mouse *HTT* gene and the RNA expression of d177 mutant *HTT*.** **a** PCR with primers for exon 1 showing the deletion of exon 1 *HTT* in d177 mutant mouse genome. **b** RT-PCR using primers specific for exon 1 and exon 2 showing that d177 mRNA is expressed at the same level as wild type *HTT* mRNA. More than three experiments were performed independently for RT-PCR analyses.

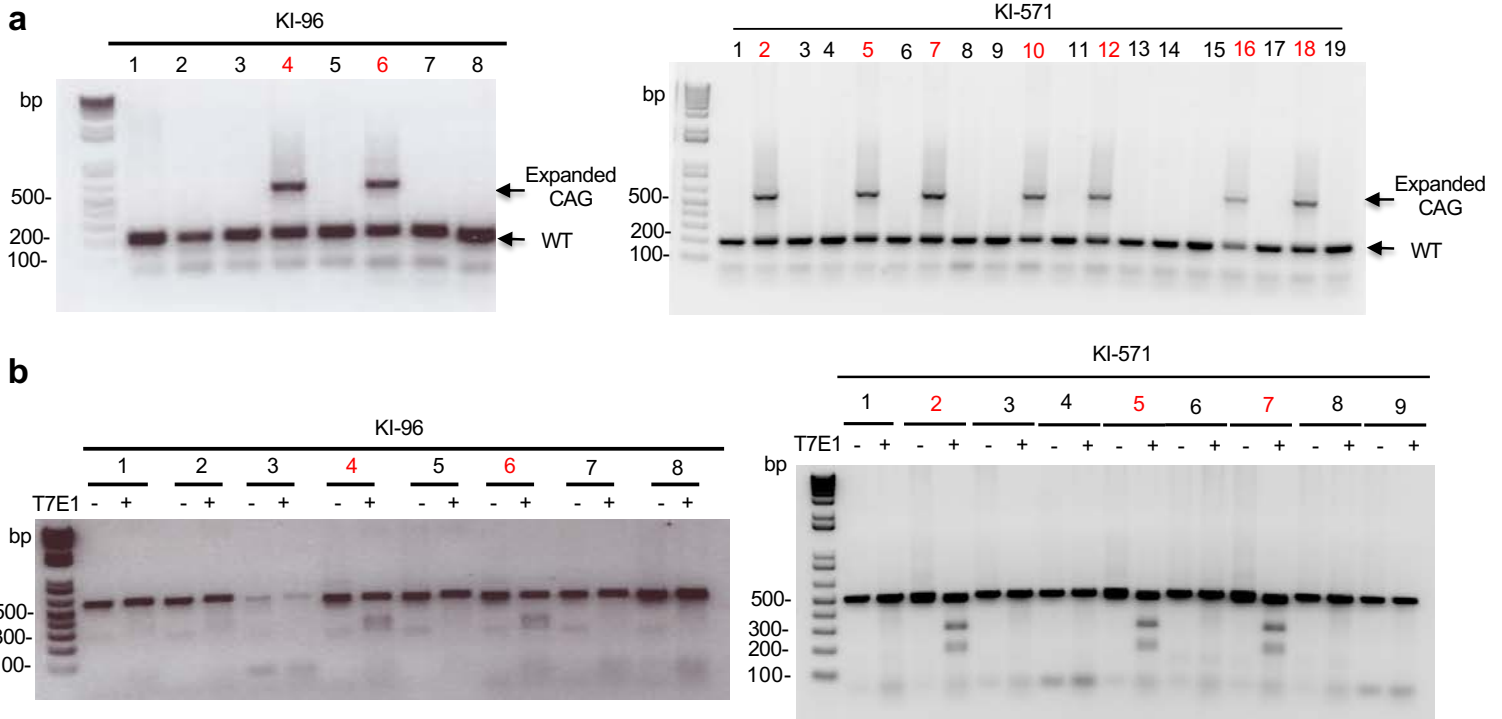

**Supplementary Figure 3. T7E1 assays verified mutations in the *HTT* gene in KI-96 and KI-571 mice.** **a** PCR revealing wild type and expanded CAG-containing *HTT* alleles in KI-96 and KI-571 mouse genomes. Red numbers indicated the presence of expanded CAG repeats. **b** Examples of T7E1 assay showing digestion of the mutant *HTT* gene in KI-96 and KI-571 mice. The numbers in red indicate the DNA samples containing mismatched expanded CAG such that the DNAs were digested. In **a** and **b**, more than three independent experiments were performed.



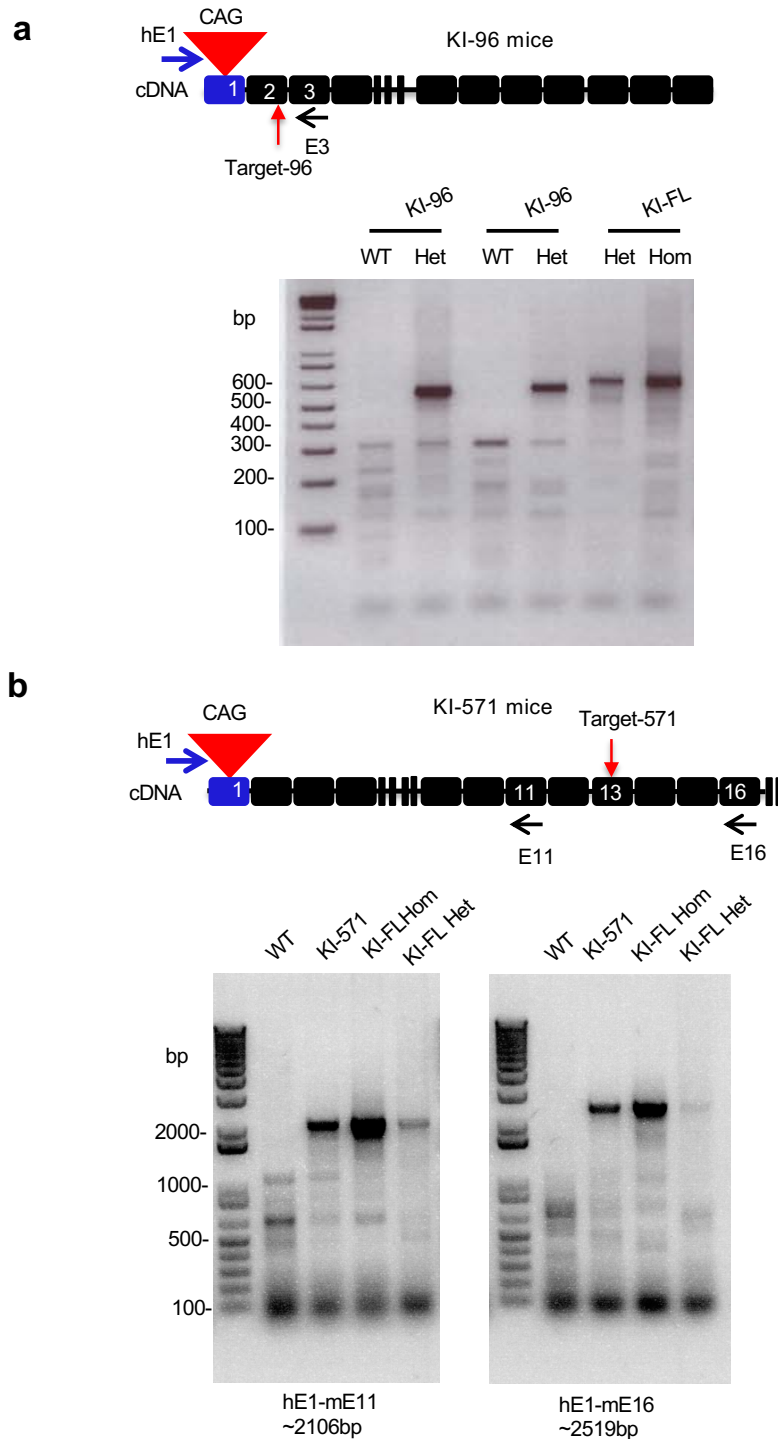

**Supplementary Figure 4. Expression of mutant *HTT* RNA in KI-96 and KI-571 mouse brains. a** RT-PCR showing the expression of mutant *HTT* in heterozygous KI-96 mouse striatum. The control is wild type and heterozygous or homozygous KI-FL mouse striatal tissues. Primers for exon 1 and exon 3 were used for PCR and can avoid PCR products from genomic DNAs. **b** RT-PCR showing the expression of mutant *HTT* in heterozygous KI-571 mouse striatum. The control is wild type and heterozygous or homozygous KI-FL (full-length *HTT*) mouse striatal tissues. Primers for exon 11 and exon 16 were used to avoid PCR products from genomic DNAs. Note that wild type mouse *HTT* cannot be amplified with human *HTT* specific primer hE1. Het, heterozygous; Hom, homozygous. The data were obtained from more than three independent experiments.

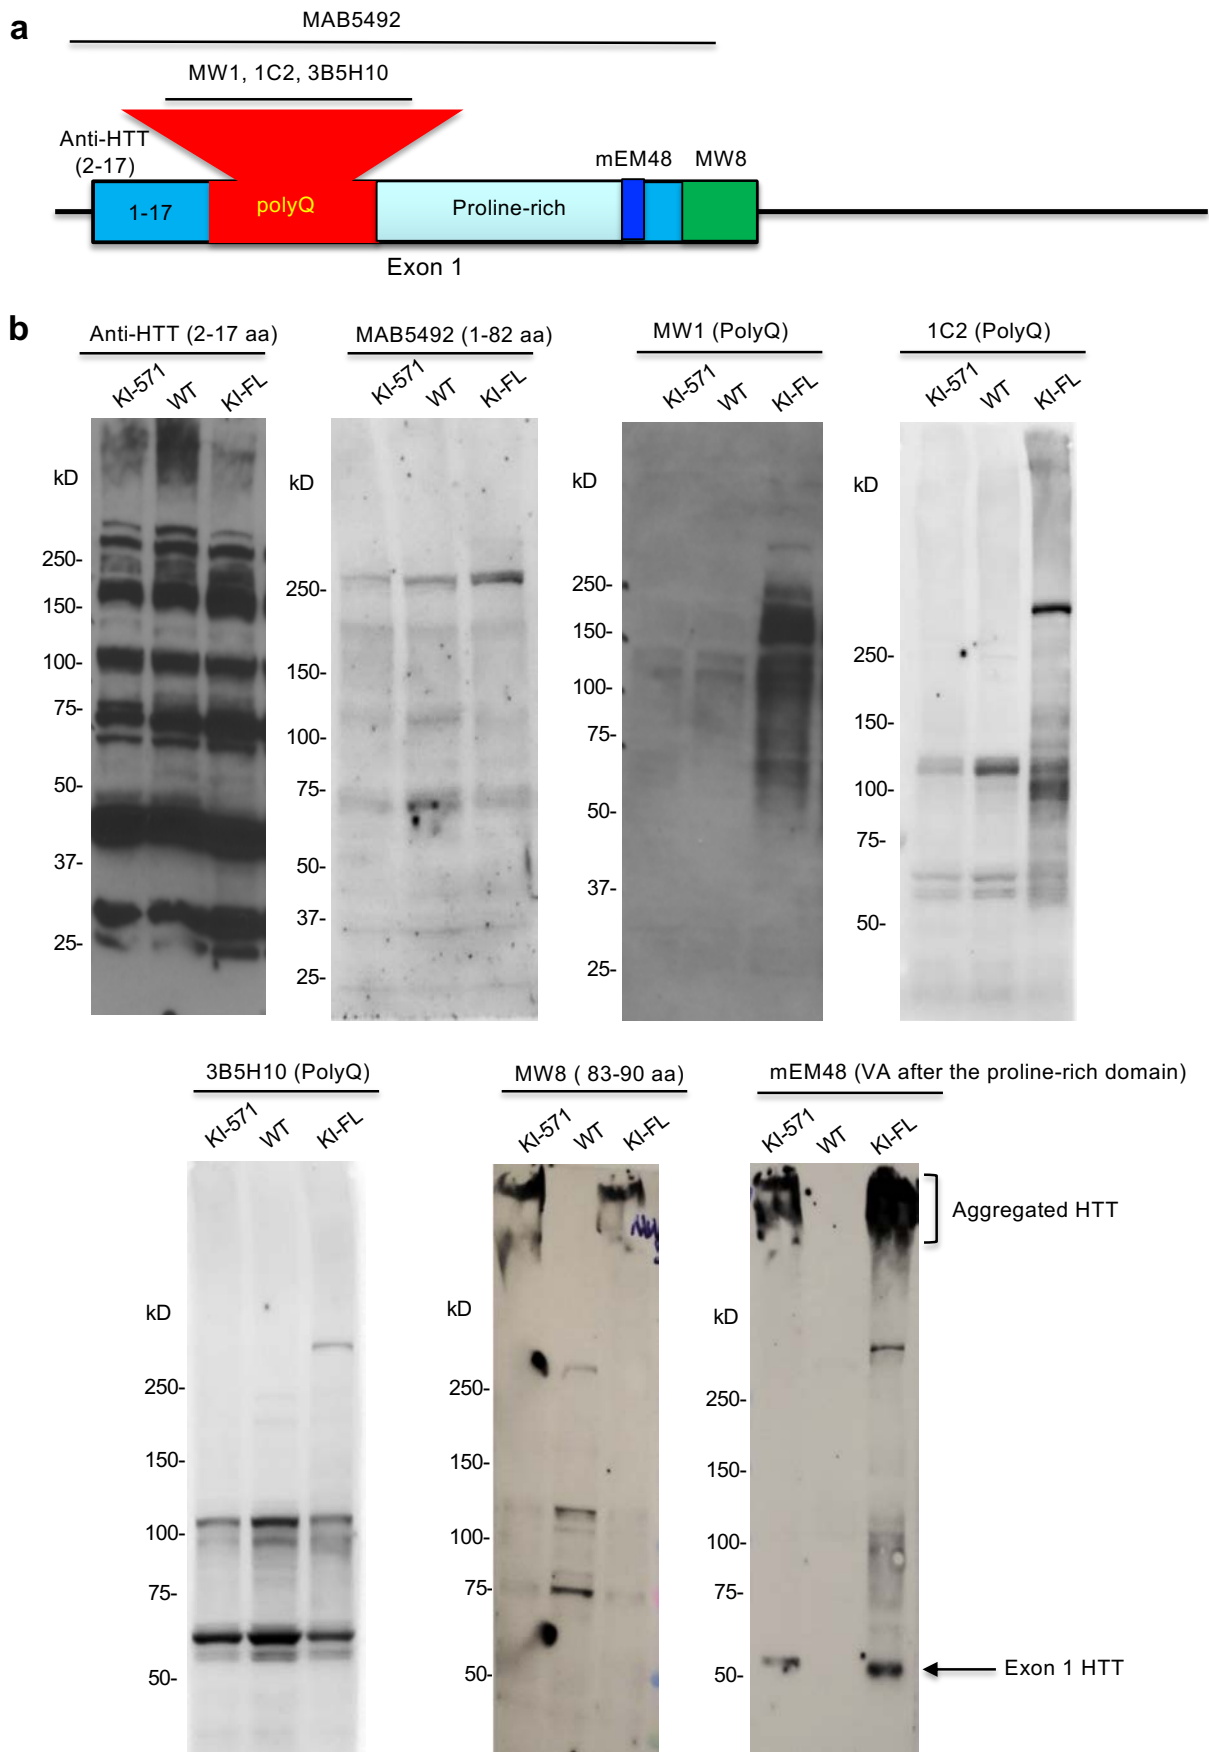

**Supplementary Figure 5. Western blotting analysis of KI mouse striatal tissues using various antibodies.**  
**a** Antibodies used in the study and their epitopes in the mouse HTT protein. **b** Western blotting with the antibodies indicated in the figure showing that only mEM48 was able to selectively recognize the stable exon 1 HTT (arrow) in KI-571 mouse striatum. Controls include wild type and HD140Q KI (KI-FL) mouse striatal tissues.

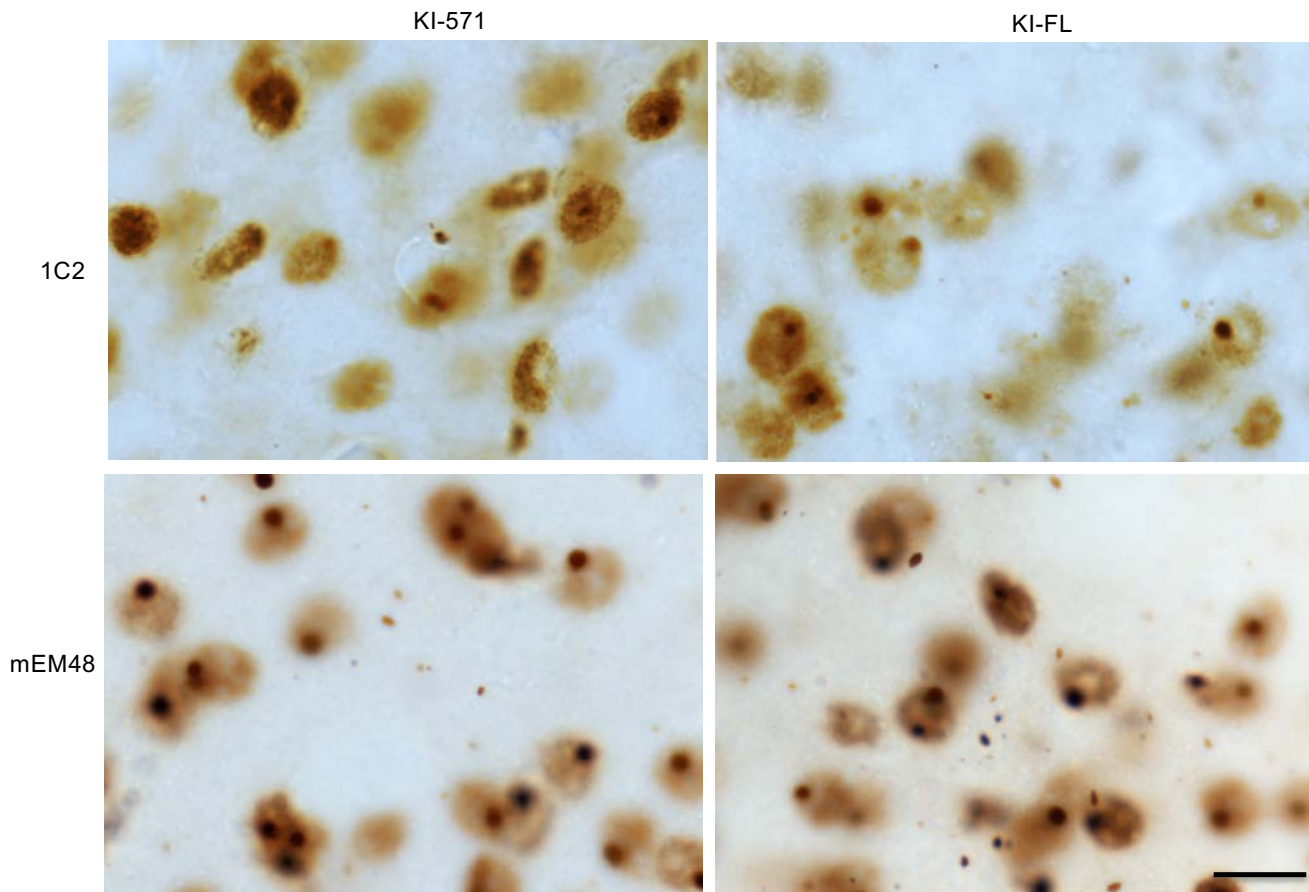

**Supplementary Figure 6. Immunocytochemical staining of the striatum of KI mouse brains.** The striatum of HD140Q KI (KI-FL) and KI-571 mice at 11 months of age was stained with antibodies mEM48 and 1C2. Scale bar: 15  $\mu$ m.

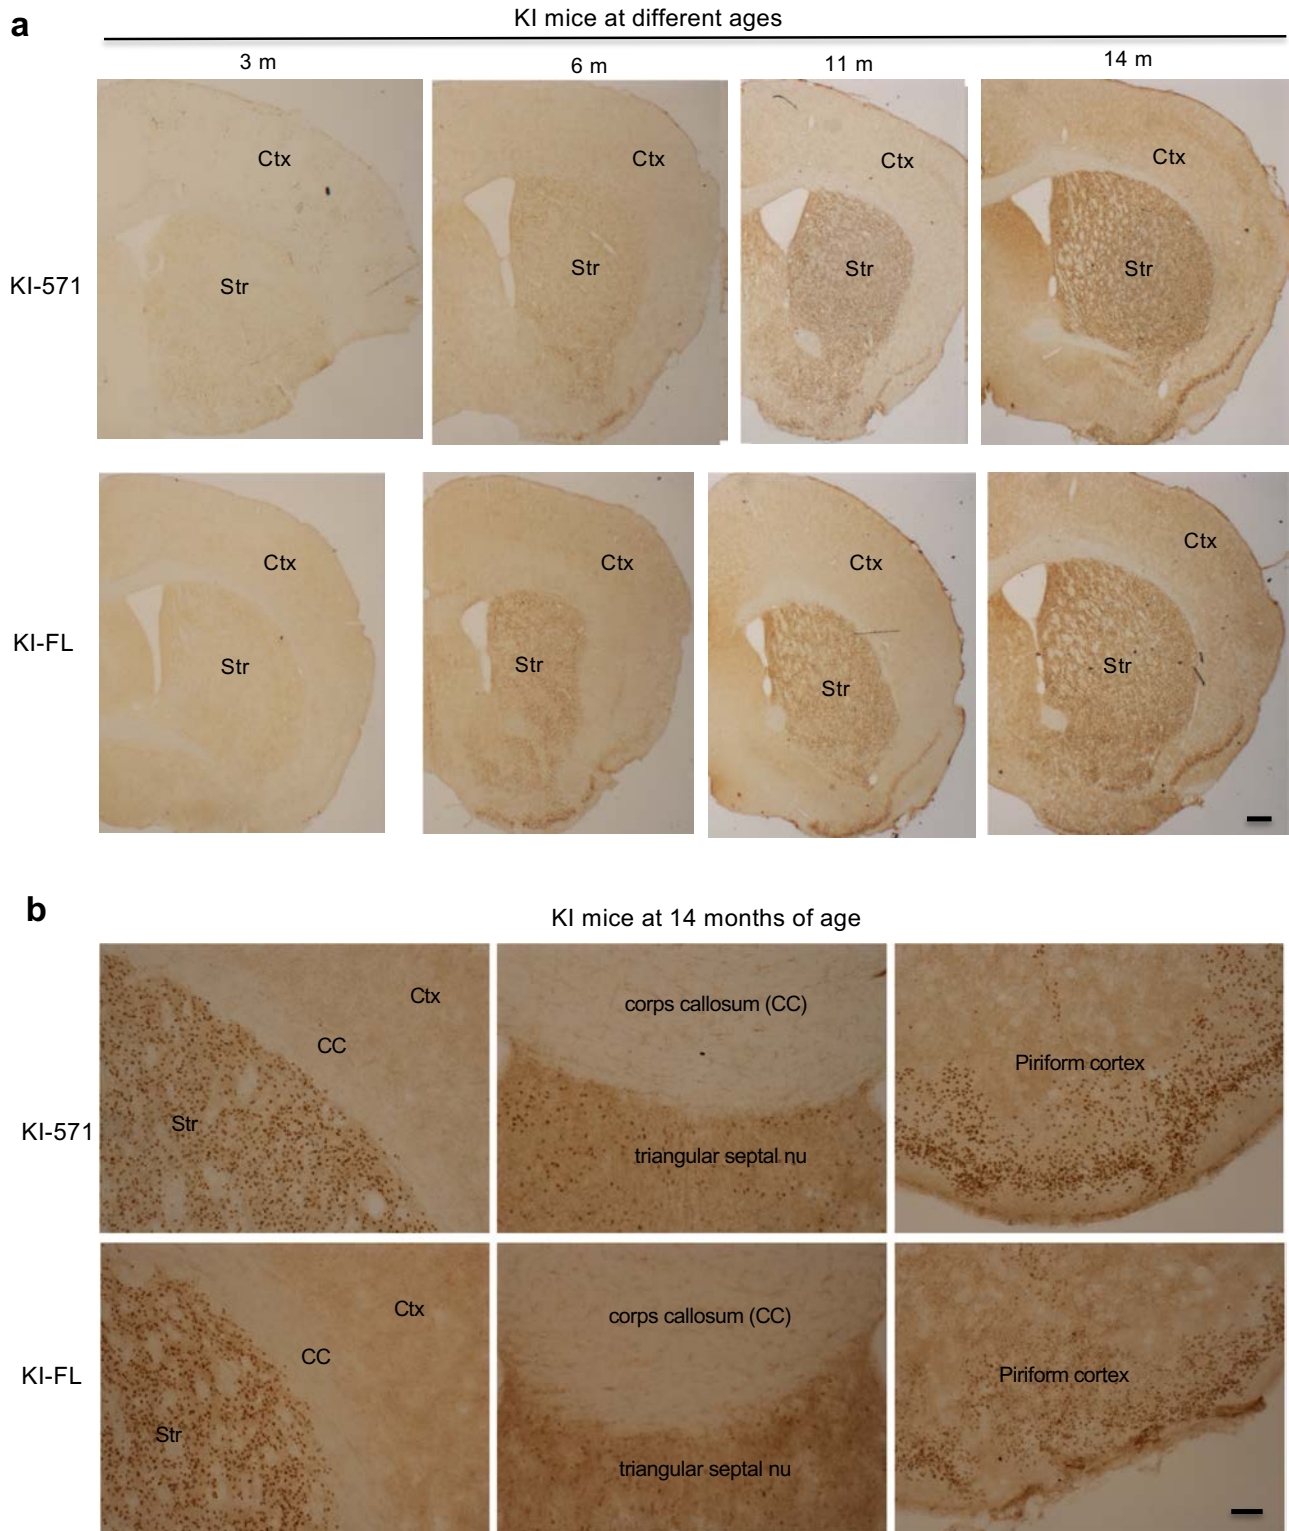

**Supplementary Figure 7. Age-dependent and selective accumulation of mutant HTT in the striatum in KI-571 and KI-FL mice.** **a** Comparison of mutant HTT distribution in different brain regions in KI-571 and KI-FL mice at different ages. Scale bar: 200  $\mu$ m. **b** Similar extent and distribution of nuclear accumulation of mutant HTT in KI-571 and KI-FL mice at 14 months of age. Scale bar: 100  $\mu$ m.

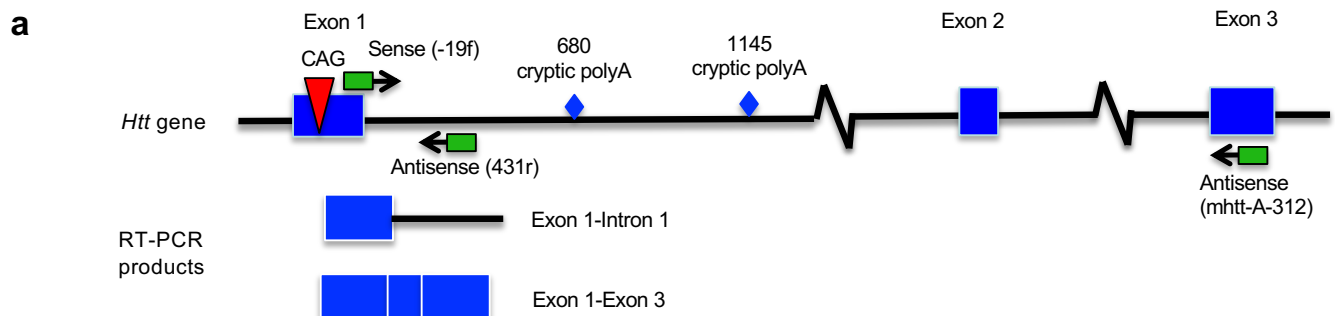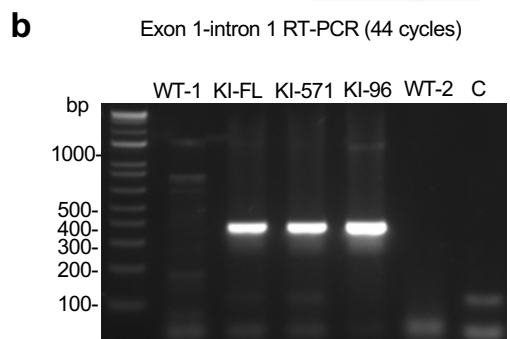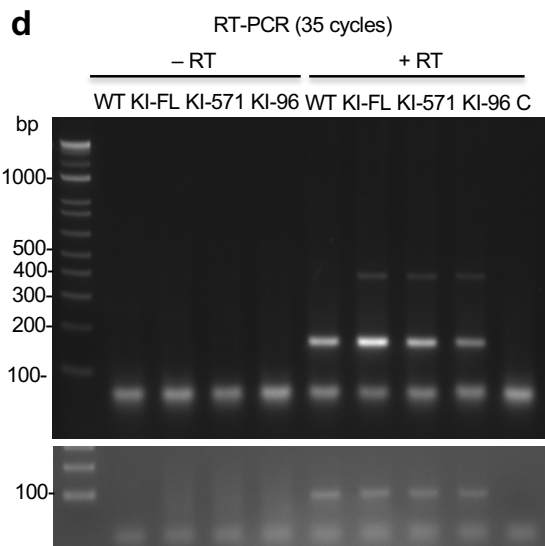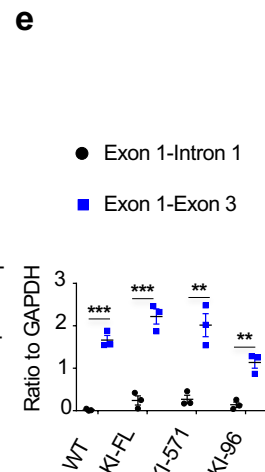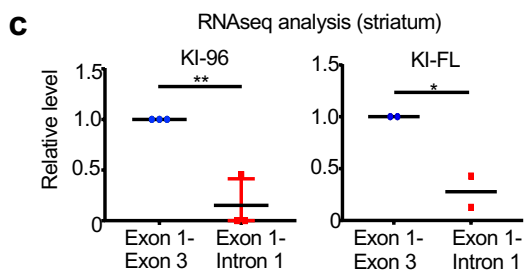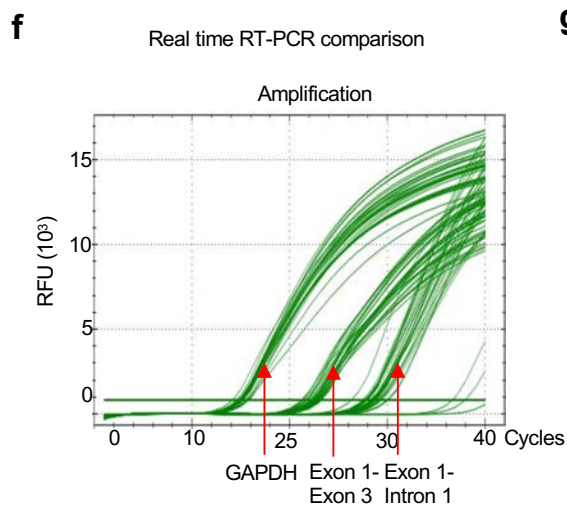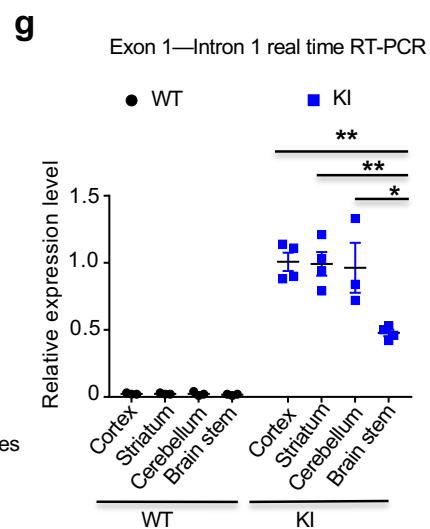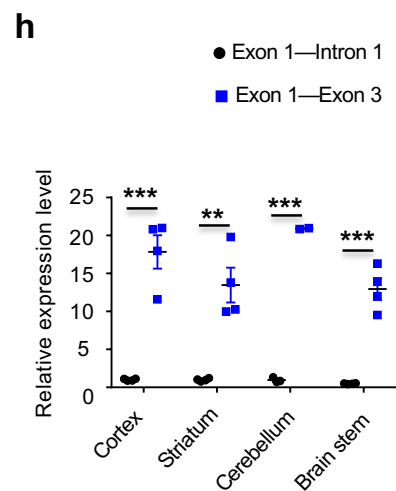



**Supplementary Figure 8. Comparison of mutant *HTT* mRNA expression in different KI mouse striatum.** **a** PCR primers used for RT-PCR to determine the expression of mutant *HTT*. **b** RT-PCR of the incomplete spliced *HTT* (exon 1-intron 1) in WT and KI-FL mouse striatum. **c** RNAseq analysis of read counts of exon 1-exon 3 and exon 1-intron 1 sequences in KI-96 ( $n = 3$ ) and KI-FL ( $n = 2$ ) mouse striatum. **d** RT-PCR results showing mutant *HTT* mRNA expression in different KI mouse striatum. Controls are RT-PCR without reverse transcriptase, which can rule out products from genomic DNA amplification. **e** Quantitative data of the relative expression of mutant *HTT* mRNA (ratio to GAPDH), which were obtained from RT-PCR in (d) ( $n = 3$ ,  $**P < 0.01$ ,  $***P < 0.001$ , 2-tailed student  $t$  test, WT,  $t = 14.77$ ,  $P < 0.001$ ; KI-FL,  $t = 9.482$ ,  $P < 0.001$ ; KI-571,  $t = 6.077$ ,  $P = 0.0037$ ; KI-96,  $t = 6.72$ ,  $P = 0.0025$ ). The data are presented as mean  $\pm$  SEM. **f** Real time PCR results showing the amplification of cDNAs for GAPDH, exon 1-exon 3 or exon 1-intron 1 *HTT*. **g** Comparison of WT and KI-FL mice for the expression levels of exon 1-intron 1 detected by RT-PCR ( $n = 3$  for WT group,  $n = 4$  for KI group,  $**P < 0.01$ ,  $***P < 0.001$ , one-way ANOVA with Turkey post-tests comparing exon1-intron1 level in different brain regions in KI,  $F = 7.793$ ,  $P = 0.0046$ ). The data are presented as mean  $\pm$  SEM. **h** Comparison of exon 1-exon 3 and exon 1-intron 1 *HTT* levels in different brain regions in KI-FL mice. The data were obtained from 3 independent experiments of 4 KI-FL mice,  $**P < 0.01$ ,  $***P < 0.001$ , 2-tailed student  $t$  test, cortex,  $t = 7.658$ ,  $P < 0.001$ ; striatum,  $t = 5.455$ ,  $P = 0.00158$ ; cerebellum,  $t = 81.42$ ,  $P < 0.001$ ; brain stem,  $t = 8.669$ ,  $P < 0.001$ ). The data are presented as mean  $\pm$  SEM.

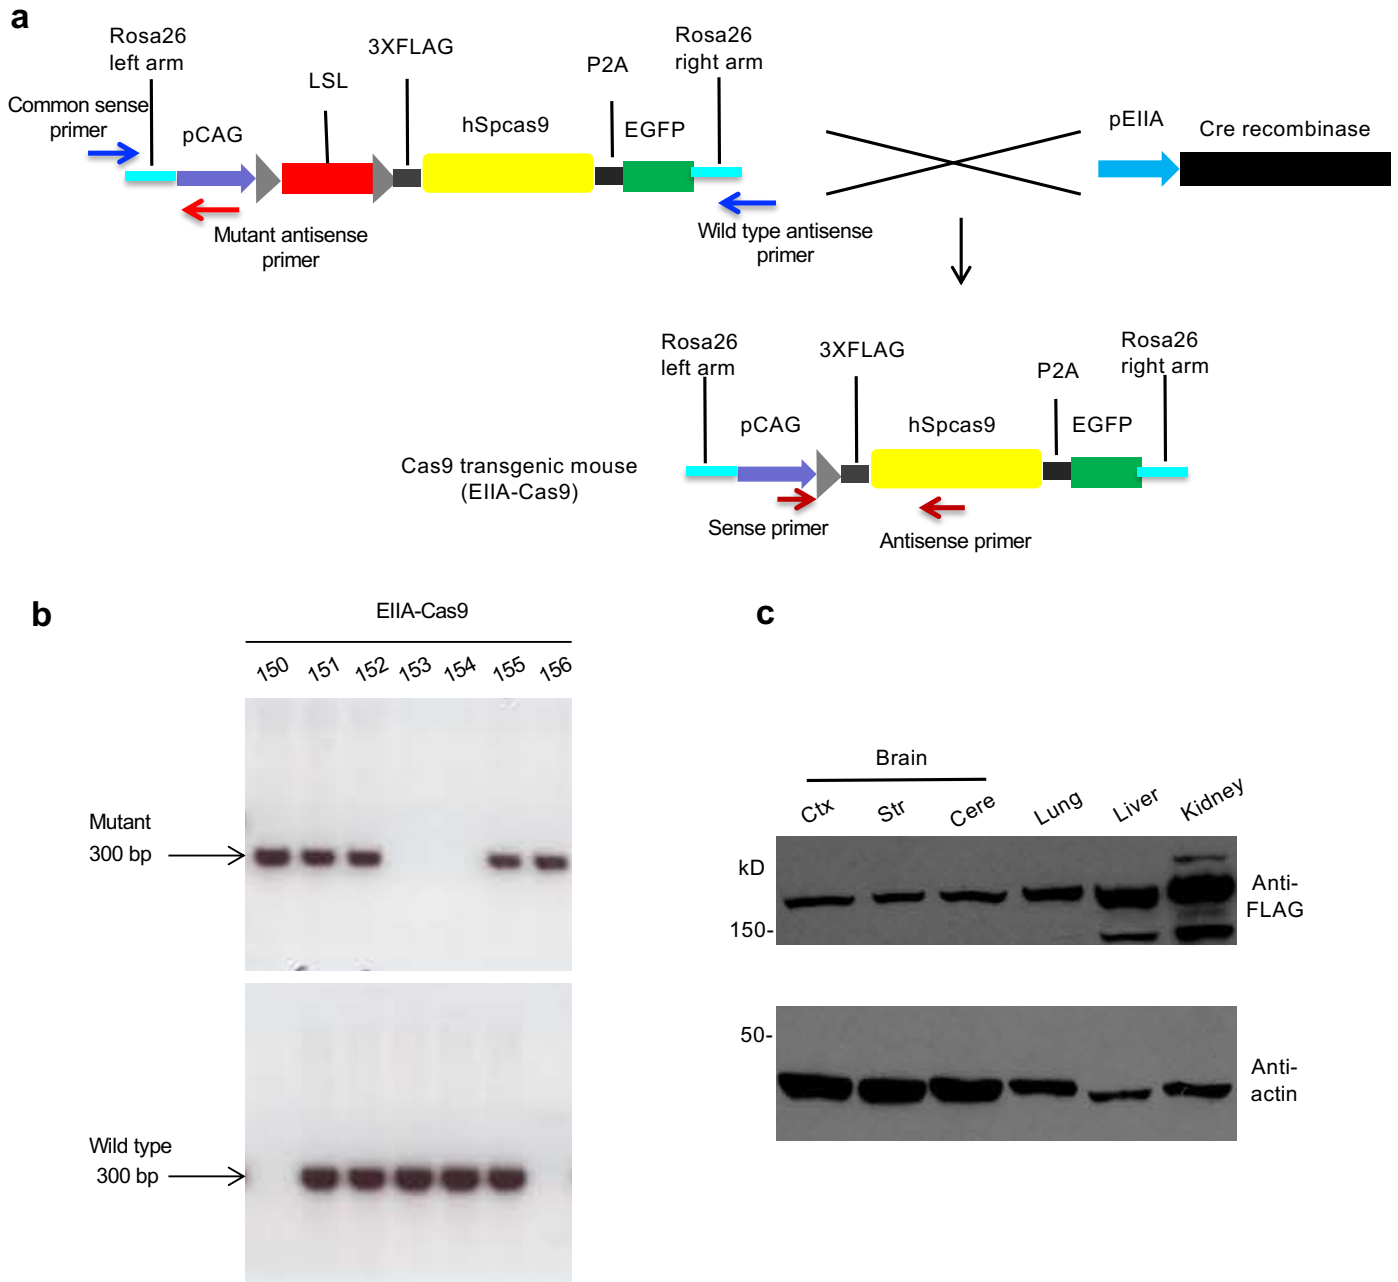

**Supplementary Figure 9. Generation of HD140Q KI/Cas9 (KI/Cas9) mice.** **a** Conditional Cas9-flag mice were crossed with EIIA-Cre transgenic mice to generate offspring in which Cre recombination has removed the inhibitory LSL to allow the expression of Cas9-flag ubiquitously under the pCAG promoter. **b** PCR genotyping verified the presence of transgenic Cas9 in KI/Cas9 mice. **c** Western blotting of KI/Cas9 mouse brain tissues showing the expression of Cas9-flag. The blot was probed with anti-flag and anti-actin.

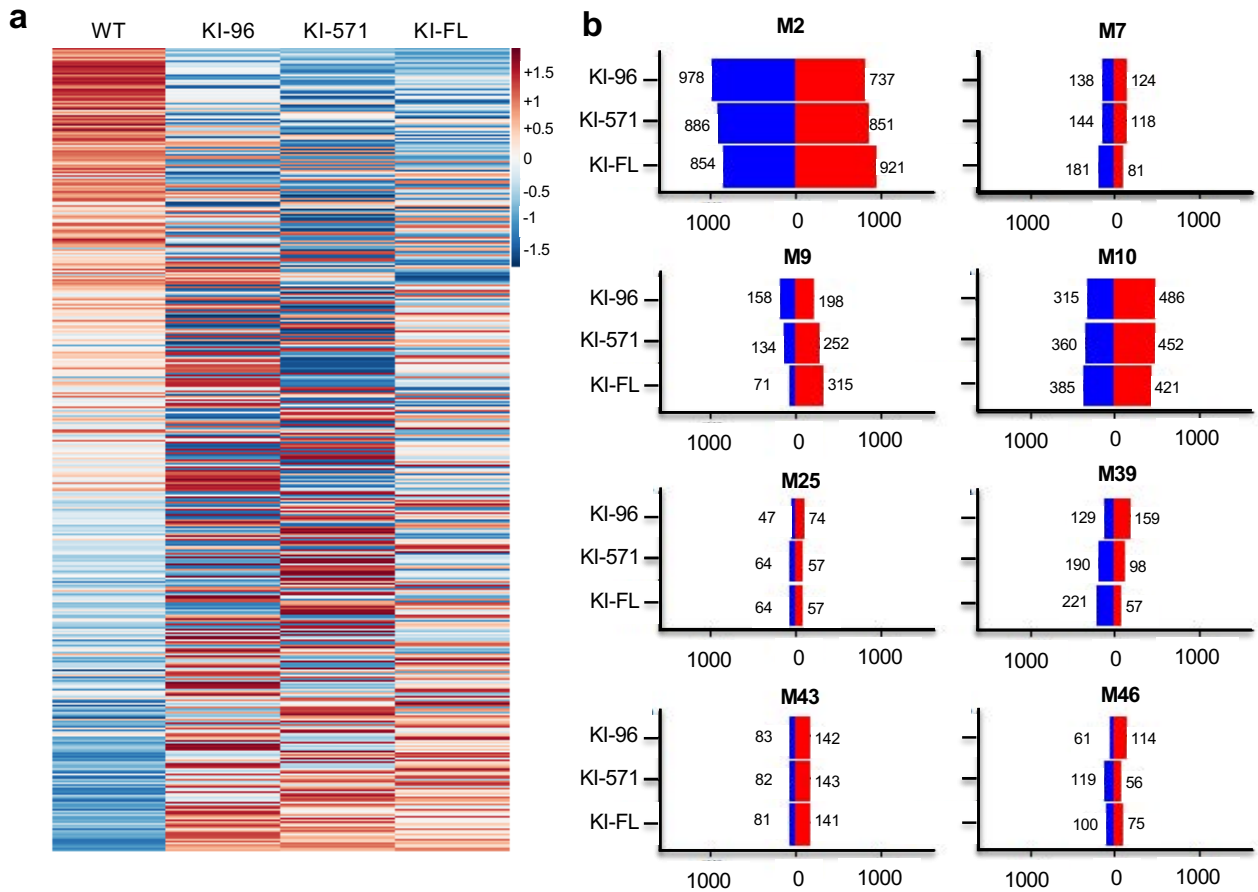

**Supplementary Figure 10. Similar alterations in gene transcription in all KI mouse striatum. a** Heat map representing gene expression patterns of differential expression genes when comparing WT with KI-96, KI-571, and KI-FL mice. The heatmap represents normalized mean values of a total of 4025 genes. Each column represents data of each genotype ( $n = 4$  mice per genotype). **b** Similar changes of modules in KI-96, KI-571, and KI-FL when comparing with WT. Modules related to different cellular functions (M2: repeat-associated HD signaling; M7: cell death signaling; M9: mitochondria and transport; M10: UBI conjugation; M25: glutamate receptor signaling; M39: DNA repair; M43: fatty acid catabolic process; M46: glucocorticoid signaling) were selected for comparison. The data were obtained from RNAseq analysis of the striatum in WT and HD KI mice at 6 months of age ( $n = 4$  mice per genotype). The bar plot was generated based on averages of log<sub>10</sub> p-value of the grouped genes in different modules (KI-FL vs. WT, KI-96 vs. WT and KI-571 vs. WT).



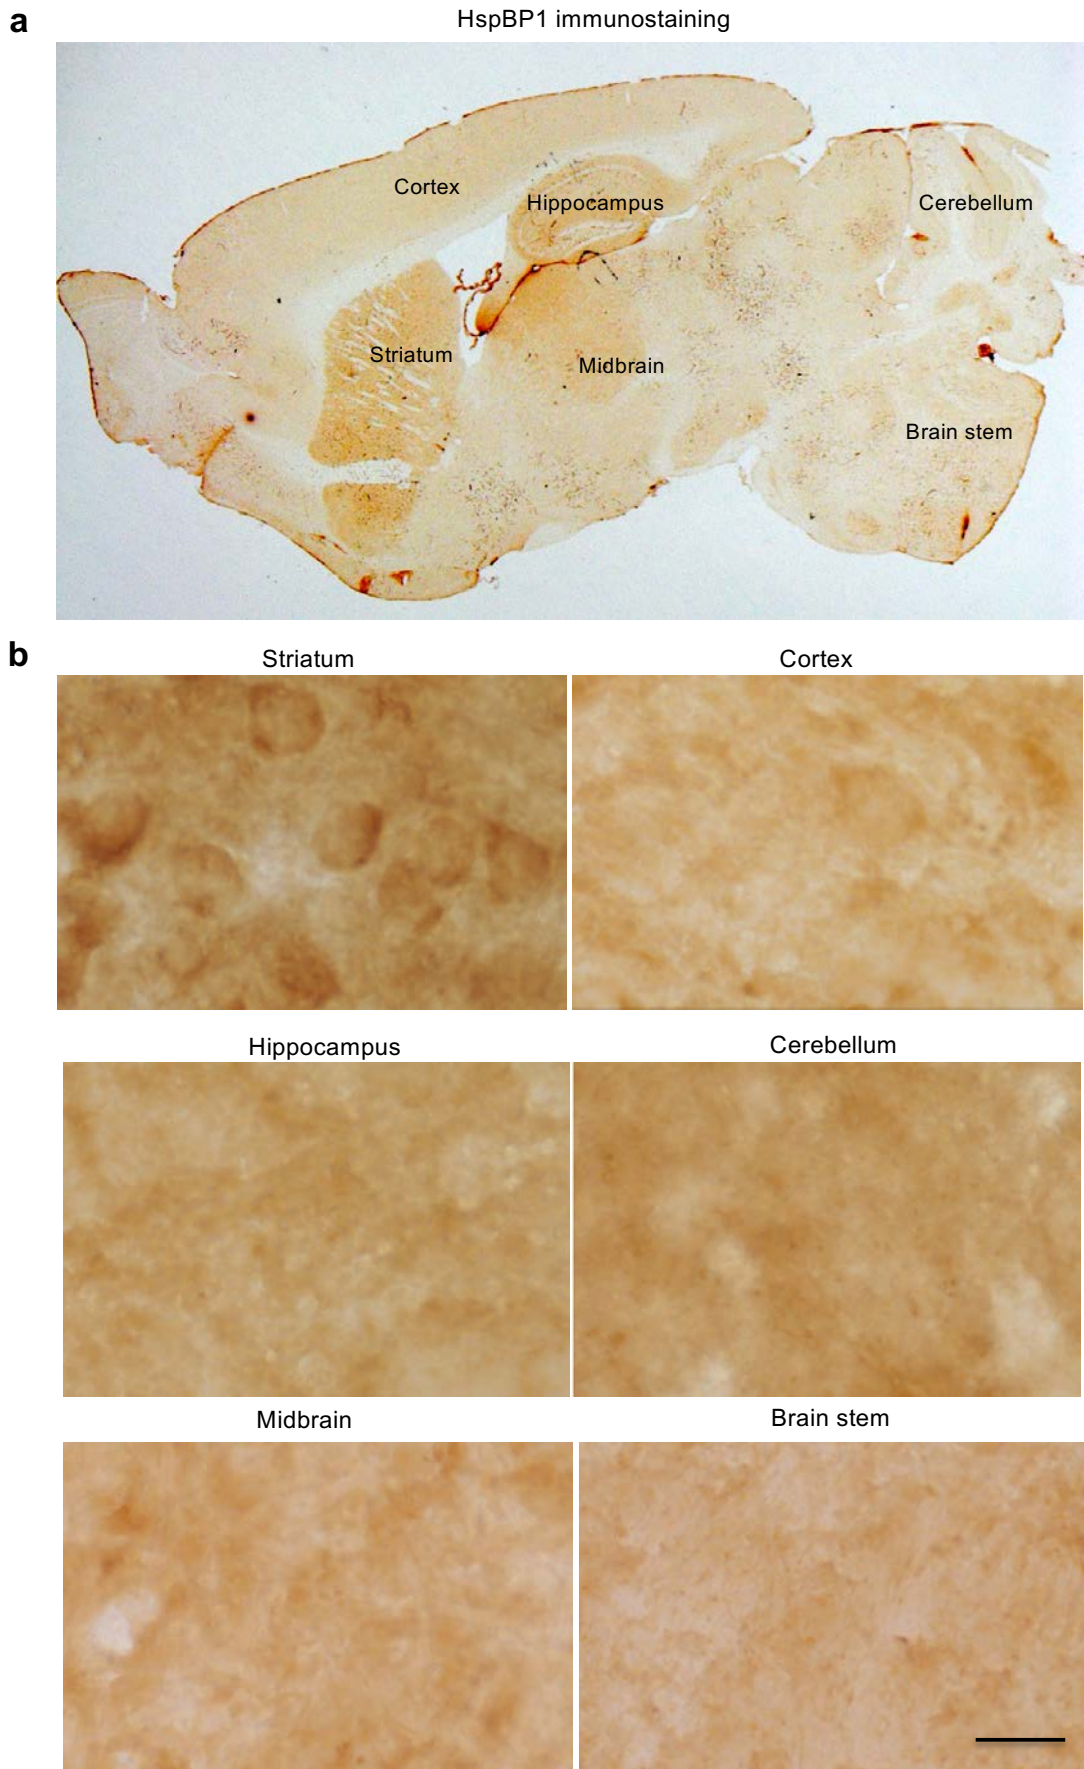

**Supplementary Figure 11. HspBP1 immunostaining of the mouse brain. a, b** Low (a) and high (b) magnification micrographs showing that HspBP1 is enriched in the neuronal cells in the striatum of a WT mouse at the age of 6 months. Scale bar: 15  $\mu$ m.

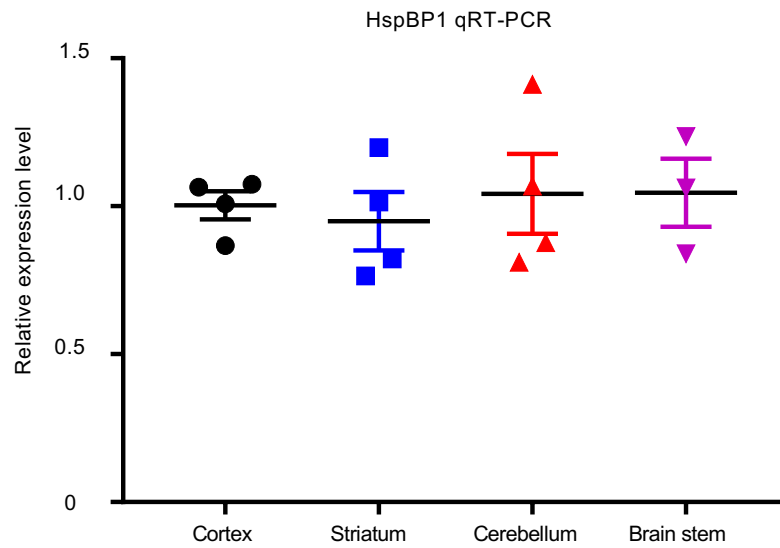

**Supplementary Figure 12. HspBP1 RT-PCR showing that HspBP1 mRNA expression in different mouse brain regions is at similar levels.** The data are mean  $\pm$  SEM and were obtained from 3 independent experiments using 4 wild type mice at 2.5 months of age ( $*P < 0.05$ ,  $***P < 0.001$ , one-way ANOVA with Tukey post-tests,  $F = 0.1866$ ,  $P = 0.9033$ ).

## Supplementary tables

### Supplementary Table 1

| REAGENT or RESOURCE                                            | SOURCE             | IDENTIFIER             |
|----------------------------------------------------------------|--------------------|------------------------|
| <b>Antibodies</b>                                              |                    |                        |
| Mouse monoclonal anti-huntingtin, clone mEM48                  | Chemicon           | Cat# MAB5374           |
| Mouse monoclonal anti-huntingtin, clone MW8                    | DSHB               | Cat# AB_528297         |
| Mouse monoclonal anti-polyglutamine, clone 3B5H10              | Sigma              | Cat# P1874             |
| Mouse monoclonal anti-polyglutamine, clone 5TF1-1C2            | Chemicon           | Cat# MAB1574           |
| Mouse monoclonal anti-huntingtin, clone HU_2E8                 | Chemicon           | Cat# MAB2166           |
| Mouse monoclonal anti-huntingtin                               | Chemicon           | Cat# MAB5492           |
| Anti-HTT (2-17)                                                | (Enzo Life)        | Cat# BML-PW0595        |
| Mouse monoclonal anti-GAPDH                                    | Chemicon           | Cat# MAB374            |
| Mouse monoclonal anti-Vinculin                                 | Sigma              | Cat# V9131             |
| Rabbit polyclonal anti-Actin                                   | Sigma              | Cat# A5060             |
| Mouse monoclonal anti- $\gamma$ tubulin                        | Sigma              | Cat# T6557             |
| Rabbit polyclonal anti-GFAP                                    | Thermo Fisher      | Cat# RB-087-A          |
| Mouse monoclonal anti-FLAG                                     | Sigma              | Cat# F1804             |
| Rabbit polyclonal anti-GFP                                     | Sigma              | Cat# G1544             |
| Rabbit polyclonal anti-RFP                                     | MBL                | Cat# PM005             |
| Donkey Anti-Rabbit                                             | Jackson Immunolabs | Cat# 715-035-152       |
| Donkey Anti-Mouse                                              | Jackson Immunolabs | Cat# 715-035-151       |
| Goat Anti-Rabbit IgG (H+L) Biotinylated                        | Vector Labs        | Cat# BA-1000           |
| Goat Anti-Mouse IgG (H+L) Biotinylated                         | Vector Labs        | Cat# BA-9200           |
| DAPI                                                           | Sigma              | Cat# D9542             |
| Goat anti-Rabbit IgG (H+L) Secondary Antibody, Alexa Fluor 488 | Thermo Fisher      | Cat # A-11034          |
| Mouse anti-HspBP1                                              | Santa Cruz Biotech | Cat# 390467 (for WB)   |
| Rabbit anti-HspBP1                                             | Sigma              | Cat#A0771444 (for ICC) |

### Supplementary Table 2

| <b>Bacterial and Virus Strains</b>                   |                                       |              |
|------------------------------------------------------|---------------------------------------|--------------|
| XI1-blue                                             | Stratagene                            | Cat#200249   |
| AAV-2/9                                              | Viral Vector Core at Emory University | N/A          |
| <b>Chemicals, Peptides, and Recombinant Proteins</b> |                                       |              |
| T7 Endonuclease I                                    | NEB                                   | Cat# M0302S  |
| <b>Critical Commercial Assays</b>                    |                                       |              |
| ECL™ Prime Western Blotting System                   | GE Healthcare                         | Cat# RPN222  |
| VECTASTAIN Elite ABC Kits                            | Vector                                | Cat# PK-2200 |

### Supplementary Table 3

#### gRNA sequence and targeting exons

| Name of sgRNA    | mRNA locus | Amino acid locus | Exon locus     | Sequence (PAM sequence are shown in red)                  |
|------------------|------------|------------------|----------------|-----------------------------------------------------------|
| Human HTT-T1     |            |                  | E1             | GGCCTTCATCAGCTTTTCCAGG<br>G                               |
| Mouse HTT-96     | 272-287    | 91-96(AA)        | E2             | GGCACAGTCTCTCAGGTAATT<br>GG                               |
| Mouse HTT-571    | 1692-1715  | 564-572(AA)      | E13            | GGTGCCGATAGCCAGTATTTA<br>GG                               |
| Mouse HTT-(d177) |            | 56 aa deletion   | E1-T1<br>E1-T3 | CCCTGGAAAAGCTGATGAAGG<br>C<br>CCAAGGTCCGGCAGAGGAACCG<br>C |
| Mouse HTT-1367   |            | 1295-1369 (AA)   | E31            | GGAGCAGGAGCGTGATGCCTC<br>GG                               |
| Mouse HspBP1     |            |                  | E2             | GGGGGCAGTGGTTCCTCGGCG<br>GGGGG                            |
| Control gRNA     |            |                  |                | ACC GGA AGA GCG ACC TCT TCT                               |

### Supplementary Table 4

## Oligonucleotides

| Name of primer   | Sequence                              | Function                          |
|------------------|---------------------------------------|-----------------------------------|
| msHTT-s-94       | GCTGCTAAGTGGCGCCGCGTAG                | PCR genotyping, RT-PCR            |
| HD01#3           | GCGGCTGAGGGGGTTGA                     | PCR genotyping, RT-PCR            |
| hHDA177          | GAGGCAGCAGCGGCTGTGCCTG                | PCR genotyping, RT-PCR / qRT-PCR  |
| HD4(25)          | ATGGCCTTCGAGTCCCTCAAGT                | PCR genotyping, RT-PCR / qRT-PCR  |
| HTT-571 F1       | TAATACGACTCACTATAGGTGCCGATAGCCAGTA    | In vitro sgRNA mRNA synthesis     |
| HTT-571 R1       | TTCTAGCTCTAAAACAATACTGGCTATCGGCAC     | In vitro sgRNA mRNA synthesis     |
| HTT-96 F1        | TAATACGACTCACTATAGGCACAGTCTCTCAGGT    | In vitro sgRNA mRNA synthesis     |
| HTT-96 R1        | TTCTAGCTCTAAAACATTACCTGAGAGACTGTGC    | In vitro sgRNA mRNA synthesis     |
| T1-F1            | TAATACGACTCACTATAGGCCTTCATCAGCTTTTCCA | In vitro sgRNA mRNA synthesis     |
| T1-R1            | TTCTAGCTCTAAAAGCTGATGAAGGC            | In vitro sgRNA mRNA synthesis     |
| Mouse sgRNA-571S | ACCGGTGCCGATAGCCAGTATTT               | DNA recombination for AAV plasmid |
| Mouse sgRNA-571A | AACAAATACTGGCTATCGGCACC               | DNA recombination for AAV plasmid |
| Mouse sgRNA-91S  | ACCAACAATATGTGAAAACATTG               | DNA recombination for AAV plasmid |
| Mouse sgRNA-91A  | AACCAATGTTTTACATATTGTT                | DNA recombination for AAV plasmid |
| U6-For           | GAGGGCCTATTTCCCATGATTC                | Primer for sequencing             |
| HTT-571 For      | TGCATTTACCTGTGGCCACTG                 | PCR for T7E1 assay                |
| HTT-571 Rev      | TCGCTGGCTAGTGGTGGTTC                  | PCR for T7E1 assay                |
| HTT-96-For       | ATCTGTCGTCATCCCTTCCT                  | PCR for T7E1 assay                |
| HTT-96-Rev       | TGGTACTGGCTCTGTAGTC                   | PCR for T7E1 assay                |
| mHTT-E11-R       | TGTCCGAAGGAGTCACAGCTGA                | RT-PCR                            |
| mHTT-E13-R       | TCCTGTGGCTATCGGCACCA                  | RT-PCR                            |
| mHTT-E16-R       | AGGGCCTTCACACTGACTCTC                 | RT-PCR                            |
| -19f             | AGGAACCGCTGCACCGA                     | RT-PCR                            |
| 431r             | GAGACCTCCTAAAAGCATTATGTCATC           | RT-PCR                            |
| hHD-E1-S         | TGGCTGAGGAGCCGCTGCA                   | RT-PCR                            |
| mHD-E3-A         | TCCATAGCGATGCCCAAGAG                  | RT-PCR                            |

|                   |                           |                |
|-------------------|---------------------------|----------------|
| Lop Cas9 For      | ACGTGCTGGTTATTGTGCTGTC    | PCR genotyping |
| Lop Cas9 Rev      | TTCTTCTGGCGTTCTCTTCAG     | PCR genotyping |
| Cas9 Common Sense | AAGGGAGCTGCAGTGGAGTA      | PCR genotyping |
| Cas9 Mut reverse  | CGGGCCATTTACCGTAAG TTAT   | PCR genotyping |
| Cas9 WT reverse   | CCGAAAATCTGTGGGAAGTC      | PCR genotyping |
| GAPDH-141S        | ACGACCCCTTCATTGACCTC      | RT-PCR         |
| GAPDH-498A        | GGGGGCTAAGCAGTTGGTGG      | RT-PCR         |
| GAPDH-S           | TGTTTCCTCGTCCCGTAGAC      | qRT-PCR        |
| GAPDH-A           | AATCTCCACTTTGCCACTGC      | qRT-PCR        |
| HspBP1-S2         | ATCTGCTGGTGGGTCGATAC      | qRT-PCR        |
| HspBP1-A2         | CAACACCTGCTCCTGGATG       | qRT-PCR        |
| d177 forward      | ACTGCTAAGTGGCGCCGCGTAG    | PCR genotyping |
| d177 reverse      | AGGAGGTAACCCTAGAGATCTCTGC | PCR genotyping |
| Exon31 forward    | CTAACCGCTGTCCACTAGCTGGC   | PCR genotyping |
| Exon31 reverse    | CTGTCACCTCTGGATAGCTGACTAC | PCR genotyping |
